# Supplementary material
Source: PubMed Central journal article supplement (PMC8843101)
Supplement: NIHMS1776511-supplement-1.pdf [file NIHMS1776511-supplement-1.pdf]

## Supporting information

**S1 Table.** Risk of hepatocellular carcinoma associated with different categories of increasing consecutive months with both undetectable HIV RNA and undetectable hepatitis B virus (HBV) DNA as well as consecutive months of undetectable (HBV) DNA alone among HIV/HBV-coinfected persons who received HBV-active antiretroviral therapy in the North American AIDS Cohort Collaboration on Research and Design (1995-2016; n=4,891; 78 incident hepatocellular carcinoma events identified).

| Characteristic*                           | No. Exposed <sup>†</sup> | No. Events | Person-Time | Incidence Rate (95% CI), Events/1,000 Person-Years | Unadjusted HR (95% CI) | Adjusted HR <sup>‡,§</sup> (95% CI) |
|-------------------------------------------|--------------------------|------------|-------------|----------------------------------------------------|------------------------|-------------------------------------|
| <b>Duration of Detectable HBV</b>         | 3,226                    | 38         | 11,529      | 3.3 (2.3-4.5)                                      | Reference              | Reference                           |
| Undetectable HBV for <0.5 year            | 2,866                    | 7          | 1,485       | 4.7 (1.9-9.7)                                      | 1.56 (0.69-3.53)       | 1.04 (0.40-2.72)                    |
| Undetectable HBV for 0.5-1 year           | 3,102                    | 6          | 1,625       | 3.7 (1.4-8.0)                                      | 1.27 (0.53-3.05)       | 1.22 (0.50-2.97)                    |
| Undetectable HBV for 1-2 years            | 2,843                    | 4          | 2,799       | 1.4 (0.4-3.7)                                      | 0.46 (0.16-1.29)       | 0.44 (0.15-1.27)                    |
| Undetectable HBV for 2-3 years            | 2,433                    | 4          | 2,336       | 1.7 (0.5-4.4)                                      | 0.59 (0.21-1.68)       | 0.59 (0.21-1.71)                    |
| Undetectable HBV for 3-4 years            | 2,097                    | 4          | 1,971       | 2.0 (0.6-5.2)                                      | 0.67 (0.24-1.91)       | 0.65 (0.22-1.87)                    |
| Undetectable HBV for ≥4 years             | 1,773                    | 15         | 8,374       | 1.8 (1.0-3.0)                                      | 0.46 (0.25-0.84)       | 0.34 (0.17-0.68)                    |
| <b>Duration of Detectable HIV and HBV</b> | 4,181                    | 40         | 13,923      | 2.9 (2.1-3.9)                                      | Reference              | Reference                           |
| Undetectable HIV and HBV for <0.5 year    | 3,112                    | 10         | 2,238       | 4.5 (2.1-8.2)                                      | 1.66 (0.83-3.34)       | 1.54 (0.76-3.11)                    |
| Undetectable HIV and HBV for 0.5-1 year   | 2,885                    | 5          | 1,829       | 2.7 (0.9-6.4)                                      | 0.96 (0.37-2.44)       | 0.89 (0.35-2.29)                    |
| Undetectable HIV and HBV for 1-2 years    | 2,609                    | 3          | 2,831       | 1.1 (0.2-3.1)                                      | 0.38 (0.12-1.22)       | 0.35 (0.11-1.15)                    |
| Undetectable HIV and HBV for 2-3 years    | 2,132                    | 4          | 2,127       | 1.9 (0.5-4.8)                                      | 0.68 (0.24-1.93)       | 0.62 (0.22-1.77)                    |
| Undetectable HIV and HBV for 3-4 years    | 1,730                    | 6          | 1,639       | 3.7 (1.3-8.0)                                      | 1.30 (0.54-3.11)       | 1.15 (0.47-2.79)                    |
| Undetectable HIV and HBV for ≥4 years     | 1,396                    | 10         | 5,399       | 1.9 (0.9-3.4)                                      | 0.54 (0.27-1.11)       | 0.38 (0.17-0.85)                    |

Abbreviations: CI=confidence interval; HBV=hepatitis B virus; HIV=human immunodeficiency virus; HR=hazard ratio

\* Detectable HIV=HIV RNA >500 copies/mL; Detectable HBV=HBV DNA identified on quantitative or qualitative assay; Undetectable HIV=HIV RNA ≤500 copies/mL; Undetectable HBV=no HBV DNA identified on quantitative or qualitative assay.

<sup>†</sup> Since HIV RNA and HBV DNA are time-updated variables, a given patient may be included within more than one category.

<sup>‡</sup> Models adjusted for age, sex, race/ethnicity, diabetes, time-updated HIV RNA, time-updated CD4+ cell percentage, heavy alcohol use, and year at start of follow-up.

<sup>§</sup> Test for trend for detectable HIV and HBV analysis: p=0.0167; test for trend for detectable HBV analysis: p=0.0014.

**S2 Table.** Factors associated with hepatocellular carcinoma among HIV/hepatitis B virus-coinfected persons in the North American AIDS Cohort Collaboration on Research and Design (1995-2016; n=8,354; 115 incident hepatocellular carcinoma events identified), based on multivariable Cox regression analysis accounting for death as a competing risk.

| Characteristic                                          | Unadjusted HR<br>(95% CI) | Adjusted HR*<br>(95% CI) |
|---------------------------------------------------------|---------------------------|--------------------------|
| <b>Age</b>                                              |                           |                          |
| <40 years                                               | Reference                 | Reference                |
| 40-49 years                                             | 2.20 (1.38-3.52)          | 1.96 (1.22-3.14)         |
| ≥50 years                                               | 2.80 (1.68-4.67)          | 2.53 (1.50-4.27)         |
| <b>Sex</b>                                              |                           |                          |
| Female                                                  | Reference                 | Reference                |
| Male                                                    | 2.61 (0.83-8.24)          | 1.92 (0.59-6.19)         |
| <b>Race</b>                                             |                           |                          |
| Non-white                                               | Reference                 | Reference                |
| White                                                   | 1.30 (0.90-1.88)          | 1.38 (0.93-2.04)         |
| <b>Body Mass Index</b>                                  |                           |                          |
| Not obese (<30 kg/m <sup>2</sup> )                      | Reference                 | Reference                |
| Obese (≥30 kg/m <sup>2</sup> )                          | 0.99 (0.54-1.79)          | 1.00 (0.55-1.81)         |
| <b>Diabetes mellitus<sup>†‡</sup></b>                   |                           |                          |
| No                                                      | Reference                 | Reference                |
| Yes                                                     | 2.06 (1.10-3.85)          | 1.78 (0.95-3.34)         |
| <b>Heavy alcohol use<sup>§</sup></b>                    |                           |                          |
| No                                                      | Reference                 | Reference                |
| Yes                                                     | 1.62 (1.12-2.36)          | 1.53 (1.05-2.22)         |
| <b>Chronic hepatitis C virus infection<sup>  </sup></b> |                           |                          |
| No                                                      | Reference                 | Reference                |
| Yes                                                     | 1.78 (1.22-2.62)          | 1.60 (1.07-2.39)         |
| <b>Current HIV RNA<sup>†</sup></b>                      |                           |                          |
| ≤500 copies/mL                                          | Reference                 | Reference                |
| >500 copies/mL                                          | 0.88 (0.56-1.39)          | 0.89 (0.55-1.44)         |
| <b>Current CD4+ cell percentage</b>                     |                           |                          |
| >28%                                                    | Reference                 | Reference                |
| 14-27.99%                                               | 1.47 (0.98-2.20)          | 1.46 (0.97-2.20)         |
| <14%                                                    | 0.97 (0.53-1.76)          | 1.02 (0.54-1.89)         |
| <b>Year at start of follow-up</b>                       | 0.96 (0.91-1.02)          | 0.95 (0.89-1.01)         |

Abbreviations: CI=confidence interval; HBV=hepatitis B virus; HIV=human immunodeficiency virus; HR=hazard ratio; RNA=ribonucleic acid

\* Hazard ratios adjusted for all other risk factors.

† Evaluated as a time-varying covariate.

‡ Diabetes mellitus was defined by: 1) hemoglobin A1c >6.5%, 2) prescription of anti-diabetic medication, or 3) record of a diabetes diagnosis plus the prescription of diabetes-related medication prior to start of follow-up.

§ History of heavy alcohol use defined as ever having reported while under observation in the NA-ACCORD: 1) inpatient or outpatient diagnosis of alcohol dependence/abuse, or 2) ≥3 drinks/day or ≥7 drinks/week for females; ≥4 drinks/day or ≥14 drinks/week for males on the self-reported Alcohol Use Disorders Identification Test-Consumption questionnaire.

|| Chronic hepatitis C virus infection was defined by detectable HCV RNA or available HCV genotype recorded at any time during observation.

**S3 Table.** Risk of hepatocellular carcinoma associated with time-updated hepatitis B virus (HBV) DNA level and time-updated detectable HIV and HBV status among HIV/HBV-coinfected persons who had quantitative and/or qualitative HBV DNA assessed in the North American AIDS Cohort Collaboration on Research and Design (1995-2016; n=5,316; 87 incident hepatocellular carcinoma events identified), based on multivariable Cox regression analysis accounting for death as a competing risk.

| Characteristic                                     | Unadjusted HR<br>(95% CI) | Adjusted HR*<br>(95% CI) |
|----------------------------------------------------|---------------------------|--------------------------|
| <b>Time-Updated HBV DNA</b>                        |                           |                          |
| Undetectable                                       | Reference                 | Reference                |
| Detectable                                         | 1.85 (1.21-2.84)          | 2.20 (1.40-3.44)         |
| <b>Time-Updated Detectable HIV and HBV Status†</b> |                           |                          |
| Undetectable HIV and HBV                           | Reference                 | Reference                |
| Detectable HIV, undetectable HBV                   | 0.29 (0.07-1.23)          | 0.27 (0.06-1.16)         |
| Undetectable HIV, detectable HBV                   | 1.54 (0.95-2.52)          | 1.75 (1.04-2.96)         |
| Detectable HIV and HBV                             | 1.89 (1.03-3.50)          | 2.16 (1.11-4.23)         |

Abbreviations: CI=confidence interval; HBV=hepatitis B virus; HIV=human immunodeficiency virus; HR=hazard ratio  
 \* Model evaluating time-updated HBV DNA adjusted for age, sex, race/ethnicity, diabetes, time-updated HIV RNA, time-updated CD4+ cell percentage, heavy alcohol use, and year at start of follow-up. Model evaluating time-updated detectable HIV and HBV status adjusted for adjusted for age, sex, race/ethnicity, diabetes, time-updated CD4+ cell percentage, heavy alcohol use, and year at start of follow-up.

† HIV detectable=HIV RNA >500 copies/mL; HBV detectable=HBV DNA identified on quantitative or qualitative assay; HIV suppressed=HIV RNA ≤500 copies/mL; HBV undetectable=no HBV DNA identified on quantitative or qualitative assay.

**S4 Table.** Risk of hepatocellular carcinoma associated with different categories of increasing consecutive months with undetectable (HBV) DNA and, separately, both undetectable HIV RNA and HBV DNA, among HIV/HBV-coinfected persons who had quantitative or qualitative HBV DNA assessed and received HBV-active antiretroviral therapy in the North American AIDS Cohort Collaboration on Research and Design (1995-2016; n=4,891; 78 incident hepatocellular carcinoma events identified), based on multivariable Cox regression analysis accounting for death as a competing risk.

| Characteristic*                             | Unadjusted HR<br>(95% CI) | Adjusted HR <sup>†</sup><br>(95% CI) |
|---------------------------------------------|---------------------------|--------------------------------------|
| <b>Duration of Undetectable HBV</b>         |                           |                                      |
| Detectable HBV                              | Reference                 | Reference                            |
| Undetectable HBV for <1 year                | 1.41 (0.74-2.71)          | 1.12 (0.54-2.32)                     |
| Undetectable HBV for ≥1 year                | 0.50 (0.30-0.82)          | 0.42 (0.24-0.74)                     |
| <b>Duration of Undetectable HBV</b>         |                           |                                      |
| Detectable HBV                              | Reference                 | Reference                            |
| Undetectable HBV for <1 year                | 1.42 (0.74-2.73)          | 1.14 (0.55-2.35)                     |
| Undetectable HBV for 1-4 years              | 0.56 (0.29-1.06)          | 0.55 (0.28-1.06)                     |
| Undetectable HBV for ≥4 years               | 0.45 (0.25-0.84)          | 0.34 (0.16-0.68)                     |
| <b>Duration of Undetectable HIV and HBV</b> |                           |                                      |
| Detectable HIV and HBV                      | Reference                 | Reference                            |
| Undetectable HIV and HBV for <1 year        | 1.34 (0.74-2.44)          | 1.25 (0.67-2.31)                     |
| Undetectable HIV and HBV for ≥1 year        | 0.62 (0.37-1.05)          | 0.51 (0.29-0.90)                     |
| <b>Duration of Undetectable HIV and HBV</b> |                           |                                      |
| Detectable HIV and HBV                      | Reference                 | Reference                            |
| Undetectable HIV and HBV for <1 year        | 1.34 (0.74-2.44)          | 1.24 (0.67-2.31)                     |
| Undetectable HIV and HBV for 1-4 years      | 0.70 (0.38-1.31)          | 0.64 (0.34-1.21)                     |
| Undetectable HIV and HBV for ≥4 years       | 0.54 (0.26-1.11)          | 0.38 (0.18-0.81)                     |

Abbreviations: CI=confidence interval; HBV=hepatitis B virus; HIV=human immunodeficiency virus; HR=hazard ratio  
 \* Detectable HIV=HIV RNA >500 copies/mL; Detectable HBV=HBV DNA identified on quantitative or qualitative assay; Undetectable HIV=HIV RNA ≤500 copies/mL; Undetectable HBV=no HBV DNA identified on quantitative or qualitative assay.

<sup>†</sup> Models adjusted for age, sex, race/ethnicity, diabetes, time-updated HIV RNA, time-updated CD4+ cell percentage, heavy alcohol use, and year at start of follow-up.

**S5 Table.** Factors associated with hepatocellular carcinoma among HIV/hepatitis B virus-coinfected persons in the North American AIDS Cohort Collaboration on Research and Design (1995-2016), stratified by platelet count (<150,000/ $\mu$ L;  $\geq$ 150,000/ $\mu$ L) at the start of follow-up.

| Characteristic                                    | Platelet Count <150,000/ $\mu$ L<br>(n=1,584; 51 incident HCC events) |            |                        | Platelet Count $\geq$ 150,000/ $\mu$ L<br>(n=6,285; 61 incident HCC events) |            |                        |
|---------------------------------------------------|-----------------------------------------------------------------------|------------|------------------------|-----------------------------------------------------------------------------|------------|------------------------|
|                                                   | Person-Time                                                           | No. Events | Unadjusted HR (95% CI) | Person-Time                                                                 | No. Events | Unadjusted HR (95% CI) |
| <b>Age</b>                                        |                                                                       |            |                        |                                                                             |            |                        |
| <40 years                                         | 3,621                                                                 | 10         | Reference              | 20,010                                                                      | 14         | Reference              |
| 40-49 years                                       | 4,693                                                                 | 27         | 2.06 (1.00-4.27)       | 20,137                                                                      | 28         | 1.94 (1.02-3.70)       |
| $\geq$ 50 years                                   | 2,327                                                                 | 14         | 2.24 (0.99-5.04)       | 10,198                                                                      | 19         | 2.80 (1.40-5.60)       |
| <b>Sex</b>                                        |                                                                       |            |                        |                                                                             |            |                        |
| Female                                            | 568                                                                   | 1          | Reference              | 3,379                                                                       | 2          | Reference              |
| Male                                              | 10,072                                                                | 50         | 2.74 (0.38-19.82)      | 46,967                                                                      | 59         | 2.08 (0.51-8.54)       |
| <b>Race</b>                                       |                                                                       |            |                        |                                                                             |            |                        |
| Non-white                                         | 4,872                                                                 | 15         | Reference              | 26,795                                                                      | 35         | Reference              |
| White                                             | 5,768                                                                 | 36         | 1.99 (1.09-3.64)       | 23,551                                                                      | 26         | 0.82 (0.49-1.36)       |
| <b>Body Mass Index</b>                            |                                                                       |            |                        |                                                                             |            |                        |
| Not obese (<30 kg/m <sup>2</sup> )                | 8,952                                                                 | 41         | Reference              | 42,445                                                                      | 52         | Reference              |
| Obese ( $\geq$ 30 kg/m <sup>2</sup> )             | 1,061                                                                 | 7          | 1.38 (0.62-3.08)       | 5,751                                                                       | 5          | 0.78 (0.31-1.95)       |
| <b>Diabetes mellitus<sup>††</sup></b>             |                                                                       |            |                        |                                                                             |            |                        |
| No                                                | 10,096                                                                | 45         | Reference              | 47,741                                                                      | 56         | Reference              |
| Yes                                               | 543                                                                   | 6          | 2.60 (1.10-6.11)       | 2,605                                                                       | 5          | 1.69 (0.68-4.21)       |
| <b>Heavy alcohol use<sup>§</sup></b>              |                                                                       |            |                        |                                                                             |            |                        |
| No                                                | 6,166                                                                 | 25         | Reference              | 27,696                                                                      | 25         | Reference              |
| Yes                                               | 4,166                                                                 | 26         | 1.51 (0.87-2.62)       | 21,489                                                                      | 35         | 1.70 (1.01-2.84)       |
| <b>Hepatitis C virus coinfection<sup>  </sup></b> |                                                                       |            |                        |                                                                             |            |                        |
| No                                                | 7,571                                                                 | 36         | Reference              | 39,379                                                                      | 36         | Reference              |
| Yes                                               | 3,069                                                                 | 15         | 1.01 (0.55-1.85)       | 10,967                                                                      | 25         | 2.44 (1.47-4.07)       |
| <b>Current HIV RNA<sup>†</sup></b>                |                                                                       |            |                        |                                                                             |            |                        |
| $\leq$ 500 copies/mL                              | 7,413                                                                 | 37         | Reference              | 35,270                                                                      | 47         | Reference              |
| >500 copies/mL                                    | 3,227                                                                 | 14         | 0.98 (0.52-1.86)       | 15,076                                                                      | 14         | 0.92 (0.50-1.71)       |
| <b>Current CD4+ cell percentage<sup>†</sup></b>   |                                                                       |            |                        |                                                                             |            |                        |
| >28%                                              | 3,508                                                                 | 17         | Reference              | 20,664                                                                      | 22         | Reference              |
| 14-27.99%                                         | 4,601                                                                 | 28         | 1.29 (0.70-2.36)       | 20,933                                                                      | 29         | 1.45 (0.83-2.53)       |
| <14%                                              | 2,531                                                                 | 6          | 0.54 (0.21-1.38)       | 8,749                                                                       | 10         | 1.32 (0.62-2.82)       |
| <b>Year at start of follow-up</b>                 | -                                                                     | -          | 0.97 (0.90-1.05)       | -                                                                           | -          | 0.95 (0.87-1.04)       |

Abbreviations: CI=confidence interval; HBV=hepatitis B virus; HCC=hepatocellular carcinoma; HIV=human immunodeficiency virus; HR=hazard ratio

<sup>\*</sup> There were too few events to permit a fully-adjusted model comparable to that in **Table 2** in the main manuscript.

<sup>†</sup> Evaluated as a time-varying covariate.

<sup>‡</sup> Diabetes mellitus was defined by: 1) hemoglobin A1c >6.5%, 2) prescription of anti-diabetic medication, or 3) record of a diabetes diagnosis plus the prescription of diabetes-related medication prior to start of follow-up.

<sup>§</sup> History of heavy alcohol use defined as ever having reported while under observation in the NA-ACCORD: 1) inpatient or outpatient diagnosis of alcohol dependence/abuse, or 2)  $\geq$ 3 drinks/day or  $\geq$ 7 drinks/week for females;  $\geq$ 4 drinks/day or  $\geq$ 14 drinks/week for males on the self-reported Alcohol Use Disorders Identification Test-Consumption questionnaire.

<sup>||</sup> Chronic hepatitis C virus infection was defined by detectable HCV RNA or available HCV genotype recorded at any time during observation.

**S6 Table.** Risk of hepatocellular carcinoma associated with time-updated hepatitis B virus (HBV) DNA level and time-updated detectable HIV and HBV status among HIV/hepatitis B virus-coinfected persons who had quantitative or qualitative HBV DNA assessed in the North American AIDS Cohort Collaboration on Research and Design (1995-2016), stratified by platelet count (<150,000/ $\mu$ L;  $\geq$ 150,000/ $\mu$ L) at the start of follow-up.

| Characteristic                                                | Platelet Count <150,000/ $\mu$ L<br>(n=1,075; 42 incident HCC events) |            |                        | Platelet Count $\geq$ 150,000/ $\mu$ L<br>(n=3,954; 43 incident HCC events) |            |                        |
|---------------------------------------------------------------|-----------------------------------------------------------------------|------------|------------------------|-----------------------------------------------------------------------------|------------|------------------------|
|                                                               | Person-Time                                                           | No. Events | Unadjusted HR (95% CI) | Person-Time                                                                 | No. Events | Unadjusted HR (95% CI) |
| <b>Time-Updated HBV DNA</b>                                   |                                                                       |            |                        |                                                                             |            |                        |
| Undetectable                                                  | 3,417                                                                 | 24         | Reference              | 18,075                                                                      | 19         | Reference              |
| Detectable                                                    | 2,821                                                                 | 18         | 0.91 (0.49-1.70)       | 9,295                                                                       | 24         | 2.90 (1.58-5.32)       |
| <b>Time-Updated Detectable HIV and HBV Status<sup>†</sup></b> |                                                                       |            |                        |                                                                             |            |                        |
| Undetectable HIV and HBV                                      | 2,981                                                                 | 23         | Reference              | 15,136                                                                      | 18         | Reference              |
| Detectable HIV, undetectable HBV                              | 436                                                                   | 1          | 0.31 (0.04-2.30)       | 6,086                                                                       | 17         | 0.39 (0.05-2.94)       |
| Undetectable HIV, detectable HBV                              | 1,906                                                                 | 9          | 0.61 (0.28-1.32)       | 2,939                                                                       | 1          | 2.75 (1.42-5.36)       |
| Detectable HIV and HBV                                        | 914                                                                   | 9          | 1.34 (0.61-2.97)       | 3,208                                                                       | 7          | 2.48 (1.01-6.07)       |

Abbreviations: CI=confidence interval; HBV=hepatitis B virus; HIV=human immunodeficiency virus; HR=hazard ratio

\* There were too few events to permit a fully-adjusted model comparable to that in **Table 4** in the manuscript.

<sup>†</sup> Detectable HIV=HIV RNA >500 copies/mL; Detectable HBV=HBV DNA identified on quantitative or qualitative assay; Undetectable HIV=HIV RNA  $\leq$ 500 copies/mL; Undetectable HBV=no HBV DNA identified on quantitative or qualitative assay.

**S7 Table.** Risk of hepatocellular carcinoma associated with different categories of increasing consecutive months with undetectable (HBV) DNA and, separately, both undetectable HIV RNA and HBV DNA, among HIV/HBV-coinfected persons who had quantitative or qualitative HBV DNA assessed and received HBV-active antiretroviral therapy in the North American AIDS Cohort Collaboration on Research and Design (1995-2016), stratified by platelet count (<150,000/ $\mu$ L;  $\geq$ 150,000/ $\mu$ L) at the start of follow-up.

| Characteristic*                             | Platelet Count <150,000/ $\mu$ L<br>(n=984; 38 incident HCC events) |            |                                        | Platelet Count $\geq$ 150,000/ $\mu$ L<br>(n=3,640; 38 incident HCC events) |            |                                        |
|---------------------------------------------|---------------------------------------------------------------------|------------|----------------------------------------|-----------------------------------------------------------------------------|------------|----------------------------------------|
|                                             | Person-Time                                                         | No. Events | Unadjusted HR <sup>†</sup><br>(95% CI) | Person-Time                                                                 | No. Events | Unadjusted HR <sup>†</sup><br>(95% CI) |
| <b>Duration of Undetectable HBV</b>         |                                                                     |            |                                        |                                                                             |            |                                        |
| Detectable HBV                              | 2,519                                                               | 15         | Reference                              | 8,280                                                                       | 22         | Reference                              |
| Undetectable HBV for <1 year                | 570                                                                 | 9          | 2.68 (1.16-6.18)                       | 2,368                                                                       | 4          | 0.85 (0.29-2.51)                       |
| Undetectable HBV for $\geq$ 1 year          | 2,273                                                               | 14         | 1.06 (0.51-2.24)                       | 12,527                                                                      | 12         | 0.32 (0.16-0.64)                       |
| <b>Duration of Undetectable HBV</b>         |                                                                     |            |                                        |                                                                             |            |                                        |
| Detectable HBV                              | 2,519                                                               | 15         | Reference                              | 8,280                                                                       | 22         | Reference                              |
| Undetectable HBV for <1 year                | 570                                                                 | 9          | 2.66 (1.15-6.15)                       | 2,368                                                                       | 4          | 0.85 (0.29-2.52)                       |
| Undetectable HBV for 1-4 years              | 1,156                                                               | 6          | 0.93 (0.36-2.44)                       | 5,597                                                                       | 5          | 0.41 (0.15-1.09)                       |
| Undetectable HBV for $\geq$ 4 years         | 1,117                                                               | 8          | 1.20 (0.48-2.99)                       | 6,930                                                                       | 7          | 0.27 (0.11-0.65)                       |
| <b>Duration of Undetectable HIV and HBV</b> |                                                                     |            |                                        |                                                                             |            |                                        |
| Detectable HIV and HBV                      | 2,836                                                               | 16         | Reference                              | 10,274                                                                      | 23         | Reference                              |
| Undetectable HIV and HBV for <1 year        | 712                                                                 | 10         | 2.43 (1.09-5.41)                       | 3,152                                                                       | 5          | 0.84 (0.32-2.22)                       |
| Undetectable HIV and HBV for $\geq$ 1 year  | 1,778                                                               | 12         | 1.27 (0.59-2.76)                       | 9,657                                                                       | 10         | 0.39 (0.18-0.82)                       |
| <b>Duration of Undetectable HIV and HBV</b> |                                                                     |            |                                        |                                                                             |            |                                        |
| Detectable HIV and HBV                      | 2,836                                                               | 16         | Reference                              | 3,078                                                                       | 23         | Reference                              |
| Undetectable HIV and HBV for <1 year        | 712                                                                 | 10         | 2.42 (1.09-5.39)                       | 2,404                                                                       | 5          | 0.84 (0.32-2.22)                       |
| Undetectable HIV and HBV for 1-4 years      | 1,065                                                               | 6          | 1.10 (0.42-2.84)                       | 2,015                                                                       | 6          | 0.53 (0.21-1.30)                       |
| Undetectable HIV and HBV for $\geq$ 4 years | 713                                                                 | 6          | 1.55 (0.57-4.19)                       | 1,113                                                                       | 4          | 0.27 (0.09-0.80)                       |

Abbreviations: CI=confidence interval; HBV=hepatitis B virus; HIV=human immunodeficiency virus; HR=hazard ratio

\* Detectable HIV=HIV RNA >500 copies/mL; Detectable HBV=HBV DNA identified on quantitative or qualitative assay; Undetectable HIV=HIV RNA  $\leq$ 500 copies/mL; Undetectable HBV=no HBV DNA identified on quantitative or qualitative assay.

<sup>†</sup> There were too few events to permit a fully-adjusted model comparable to that in **Table 5** in the manuscript.

**S8 Table.** Exploratory analysis examining risk of hepatocellular carcinoma (HCC) associated with platelet count <150,000/ $\mu$ L, after adjustment for time-updated detectable hepatitis B virus (HBV), time-updated detectable HIV, time-updated CD4+ cell percentage, and specified traditional HCC risk factors among HIV/HBV-coinfected persons who had quantitative and/or qualitative HBV DNA assessed in the North American AIDS Cohort Collaboration on Research and Design (1995-2016; n=5,029; 85 incident hepatocellular carcinoma events identified).

| Characteristic                            | No. Exposed | No. Events | Person-Time | Incidence Rate (95% CI), Events/1,000 Person-Years | Unadjusted HR (95% CI) | Adjusted HR* (95% CI) |
|-------------------------------------------|-------------|------------|-------------|----------------------------------------------------|------------------------|-----------------------|
| <b>Platelet Count (<math>\mu</math>L)</b> |             |            |             |                                                    |                        |                       |
| ≥150,000                                  | 3,954       | 43         | 27,369      | 1.6 (1.1-2.1)                                      | Reference              | Reference             |
| <150,000                                  | 1,075       | 42         | 6,237       | 6.7 (4.9-9.1)                                      | 4.51 (2.94-6.91)       | 4.05 (2.62-6.26)      |
| <b>Time-Updated HBV DNA</b>               |             |            |             |                                                    |                        |                       |
| Undetectable                              | 3,444       | 43         | 21,492      | 2.0 (1.4-2.7)                                      | Reference              | Reference             |
| Detectable                                | 3,171       | 42         | 12,115      | 3.5 (2.5-4.7)                                      | 1.89 (1.23-2.91)       | 1.89 (1.20-2.98)      |

Abbreviations: CI=confidence interval; HBV=hepatitis B virus; HCC=hepatocellular carcinoma; HIV=human immunodeficiency virus; HR=hazard ratio

\* Model additionally adjusted for age, sex, race/ethnicity, diabetes, time-updated HIV RNA, time-updated CD4+ cell percentage, heavy alcohol use, and year at start of follow-up.
